# Supplementary material
Source: PubMed Central journal article supplement (PMC5316299)

1 **Supplementary Material for:**

2

3 Stowell CP, Whitman G, Assmann SF, Gomez H, Granger S, Massey M, Shapiro N, Steiner ME,  
4 Bennett-Guerrero E., The Impact of Red Blood Cell Storage Duration on Tissue Oxygenation in  
5 Cardiac Surgery: An Ancillary Physiologic Study to the Red Cell Storage Duration Study

6

7 **MATERIALS and METHODS**

8

9 *Tissue Hemoglobin Oxygen Saturation: Data Analysis*

10

11 Raw data were uploaded to a cloud-based server and synchronized to a secure server at  
12 the central processing facility. The data files for tissue hemoglobin oxygen saturation ( $S_tO_2$ ) of  
13 the thenar eminence and cerebrum were parsed for absolute time and value data entries and  
14 converted to a common file format for analysis. Time data embedded in the  $S_tO_2$  data streams  
15 were correlated with data that were recorded directly on Case Report Forms which indicated  
16 the time points defined in the Materials and Methods section of the main text. Using a custom  
17 software application written in Matlab (Mathworks, Natick, MA),  $S_tO_2$  data were plotted as a  
18 function of time. Color-coded vertical marks delineated the times that the sensors were applied  
19 or removed, the four time points described above, all recorded transfusion start and stop times,  
20 and the time the patient entered the ICU. An analyst visually inspected the data plots for  
21 stability and selected a region of the plot for each measurement that was stable and within the  
22 timepoint window using a running average single spot measurement. The 150-sample average  
23 was taken over a period of 2.5 minutes before to 2.5 minutes after the spot to be measured.

1 For timepoint A, the spot measurement was selected during a stable period in the signal within  
2 6 hours prior to the incision and at least 2.5 minutes after the start of data recording and at  
3 least 2.5 minutes before entering the OR. For timepoint B, the spot measurement was selected  
4 during a stable period in the signal within 2 hours prior to the index transfusion AND at least 2.5  
5 minutes before the start of the index transfusion. For timepoint C, the spot measurement was  
6 selected during a stable period in the signal within 2 hours after the index transfusion AND at  
7 least 2.5 minutes after the end of the index transfusion. For timepoint D, the spot measurement  
8 was selected during a stable period in the signal most proximal to 24 hours post-ICU arrival AND  
9 at least 2.5 minutes after the beginning of timepoint D. The software then computed and  
10 recorded an average  $S_tO_2$  value for that region of the plot.

11

#### 12 *Microcirculatory Blood Flow: Data Analysis*

13 The Microscan video files were pre-processed to enhance contrast, edited to 5 sec  
14 duration, and evaluated for image quality using the method described.(1) Video files with  
15 unacceptable quality were excluded from further analysis. Video clips were sorted by quality  
16 score and up to 3 clips were selected at each of the 4 timepoints. Selected video files were  
17 assigned a random identification number before further analysis using AVA 3.1 software  
18 (Microvision Medical BV, Amsterdam, The Netherlands). Vessel centerlines and lumen  
19 boundaries were drawn using semi-automated or manual tools in AVA. All of the  
20 microcirculatory parameters reported in this study were derived from analyses of small vessels  
21 (defined as having lumen diameters below 20  $\mu\text{m}$ ) because capillaries and post-capillary venules  
22 of this size are the primary sites of oxygen diffusion between blood and tissue. Blood flow in  
23 vessel segments was evaluated in a semi-quantitative fashion using a scale of 0-3 (0: no flow, 1:

1 intermittent flow, 2: sluggish flow, 3: continuous flow). Microcirculatory parameters were then  
 2 derived from the measured small vessel total length and the perfused length.

3

#### 4 RESULTS

5

6 Table S1. Comparison of Transfused Subjects in RECESS (Parent Study) and RECAP (Ancillary  
 7 Study). These subjects received at least one RBC transfusion from 6 h prior to surgery to 24±4 h  
 8 after surgery.

9

| Parameter                                                                           | RECESS Subjects<br>N=1098  | RECAP Subjects<br>N=89     |
|-------------------------------------------------------------------------------------|----------------------------|----------------------------|
| <b>Baseline Characteristics</b>                                                     |                            |                            |
| Age – median y (Q1,Q3)                                                              | 72 (66, 79)                | 71 (66, 80)                |
| Male – n (%)                                                                        | 475 (43%)                  | 41 (46%)                   |
| Hemoglobin – median g/dl (Q1,Q3)                                                    | 11.9 (10.7, 12.9)          | 11.5 (10.5, 12.4)          |
| Creatinine – median mg/dL (Q1,Q3)                                                   | 1.0 (0.8, 1.4)             | 1.1 (0.9, 1.4)             |
| TRUST – mean (± SD)                                                                 | 3.98 (± 0.91 )             | 3.87 (± 0.80)              |
| MODS - mean (± SD)                                                                  | 0.67 (± 0.81 )             | 0.72 (± 0.75)              |
| <b>Surgery Characteristics</b>                                                      |                            |                            |
| Repeat Sternotomy – n (%)                                                           | 293 (27%)                  | 21 (24%)                   |
| Cardiopulmonary bypass duration <sup>a</sup> – median min (Q1,Q3)                   | 140 (102, 190)             | 151 (102, 209)             |
| <b>Transfusion Data (from time entering the OR until 24 h after leaving the OR)</b> |                            |                            |
| RBC Transfused - median units (Q1,Q3)                                               | 3.0 (2.0, 5.0)             | 3.0 (2.0, 5.0)             |
| Shorter Storage Time – mean d (± SD)                                                | 16.2 (± 11.1)              | 15.3 (± 10.5)              |
| Longer Storage Time - mean d (± SD)                                                 | 20.0 (± 12.8)              | 19.8 (± 13.1)              |
| <b>Outcome Measures</b>                                                             |                            |                            |
| Δ MODS 7 d – mean (± SD)                                                            | 8.58 (± 3.58) <sup>b</sup> | 8.74 (± 3.55) <sup>c</sup> |
| ICU length of stay – median d (Q1,Q3)                                               | 3 (2 , 5)                  | 2 (1, 4)                   |
| Mortality 7 d – n (%)                                                               | 26 (2.4%)                  | 2 (2.3%)                   |

10

11 <sup>a</sup> Calculated only for patients undergoing cardiopulmonary bypass.

12

13 <sup>b</sup> For the change in MODS at 7 days, data were unavailable for 11 subjects.

14

15 <sup>c</sup> For the change in MODS at 7 days, data were unavailable for one subject.

16

17

18

1 Table S2. Patient Clinical Characteristics Prior to Post-operative RBC (index) Transfusion  
2

| Clinical characteristics within 2 h of start of post-operative RBC transfusion | RECAP Subjects who had an index transfusion |                    |                      | Effect Size <sup>2</sup> |
|--------------------------------------------------------------------------------|---------------------------------------------|--------------------|----------------------|--------------------------|
|                                                                                | ≤ 10 d Arm (N=23)                           | ≥21d Arm (N=32)    | P-Value <sup>1</sup> |                          |
| Receiving supplemental oxygen – n (%)                                          | 20 (87%)                                    | 31 (97%)           | 0.30                 | 0.19                     |
| <i>Unknown</i>                                                                 | 0                                           | 0                  |                      |                          |
| Intubated – n (%)                                                              | 17 (74%)                                    | 26 (81%)           | 0.53                 | 0.09                     |
| <i>Unknown</i>                                                                 | 0                                           | 0                  |                      |                          |
| Receiving Inotrope - n (%)                                                     | 17 (77%)                                    | 21 (70%)           | 0.75                 | 0.08                     |
| <i>Unknown</i>                                                                 | 0                                           | 0                  |                      |                          |
| Systolic BP – mmHg mean (± SD)                                                 | 104.8 (15.9)                                | 109.4 (22.6)       | 0.53                 | 0.23                     |
| Diastolic BP – mmHg mean (± SD)                                                | 50.4 (8.6)                                  | 51.9 (13.8)        | 0.76                 | 0.13                     |
| Heart Rate – bpm mean (± SD)                                                   | 85.3 (12.6)                                 | 88.9 (11.3)        | 0.46                 | 0.30                     |
| FiO <sub>2</sub> - mean (± SD)                                                 | 48.5 (15.7)                                 | 46.1 (14.2)        | 0.57                 | 0.16                     |
| Blood Oxygen Saturation                                                        |                                             |                    |                      |                          |
| S <sub>a</sub> O <sub>2</sub> - mean (± SD)                                    | 100 (0)<br>N=2                              | 97 (2.9)<br>N=6    | 0.09                 | 1.13                     |
| S <sub>p</sub> O <sub>2</sub> - mean (± SD)                                    | 98.5 (2.1)<br>N=17                          | 98.6 (3.2)<br>N=25 | 0.23                 | 0.03                     |
| <i>Unknown</i>                                                                 | 3                                           | 0                  |                      |                          |

3

4

5 <sup>1</sup> P-Values for continuous variables are from a Kruskal-Wallis non-parametric test; p-Values for  
6 categorical variables are from Fisher's exact test.

7

8 <sup>2</sup> Effect sizes for binary and categorical variables were calculated using Cramer's phi statistic and  
9 were calculated as the absolute difference in means divided by the pooled standard deviation  
10 for continuous variables.

11

12

### 13 References

14

15 1. Massey MJ, Larochelle E, Najarro G, Karmacharla A, Arnold A, Trzeciak S, et al. The

16

microcirculation imaging quality score: development and primary evaluation of a

17

proposed approach to grading quality of image acquisition for bedside videomicroscopy.

18

*J Crit Care.* 2013;28:913-7.

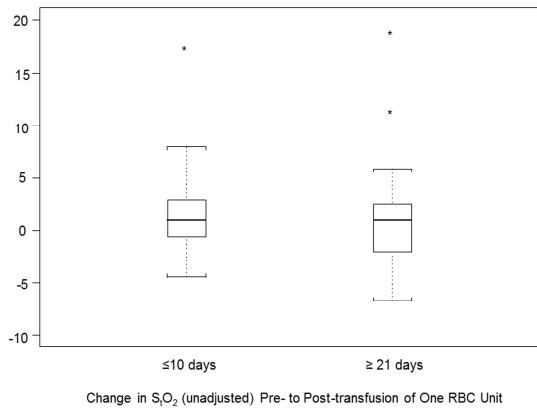

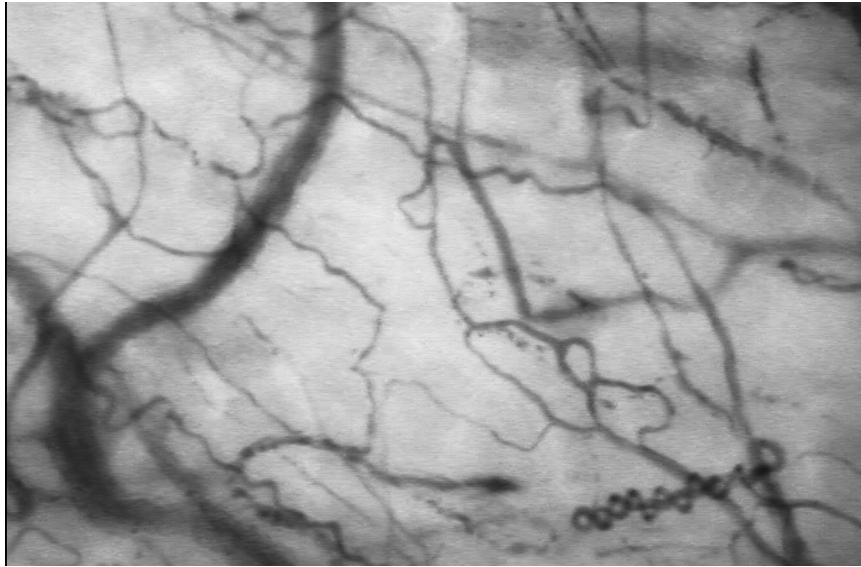

Supplement: NIHMS839698-supplement-supplement_1.pdf [file NIHMS839698-supplement-supplement_1.pdf]
